# Supplementary material for: Overexpression of ERF1-V from Haynaldia villosa Can Enhance the Resistance of Wheat to Powdery Mildew and Increase the Tolerance to Salt and Drought Stresses
Source: PubMed Central journal article supplement (PMC5712803; doi:10.3389/fpls.2017.01948), 2017-11-29
Supplement: Image_1.pdf [file Image_1.pdf]

## Supporting Information

### Supporting Table S1. Designed primers

**Supporting Figure S1.** Amino acid sequence alignment of the conserved AP2 domain in the B2 type ERF proteins and the three dimensional structure of the AP domain in the ERF1-V.

(a) Multiple alignment of the conserved AP2 domain in the B2 type ERF proteins. The RAP2.3 (NM\_112550) and RAP2.12 (NP\_175794) of *Arabidopsis thaliana*, JERF1 (AY044235) and JERF3 (EU910896) from *Solanum lycopersicum*, GmERF3 (EU681278) of *Glycine max* and GhERF2 (AY781117) of *Gossypium hirsutum* were downloaded from the NCBI and used to make the multiple alignment with ERF1-V. The red asterisk above the sequences indicate the conserved amino acid 'A' and 'D' specific to *ERF* subfamily genes which was distinct from that of the *DREB* subfamily genes. Three  $\beta$ -sheets and one  $\alpha$ -helix were underlined.

(b) Three dimensional structure of the AP domain in the ERF1-V.

**Supporting Figure 2.** The phylogenetic analysis of ERF1-V and related proteins by MEGA6.

ERF1-V was classified to the B2 type ERF subfamily. The sequence of AtERF4 (AY140030), AtERF7 (AB032201), AtERF3 (AB008105), AtERF1 (NM\_113225), AtERF110 (NP\_199819), ABR1 (NM\_125871), RAP2.3 (NM\_112550), RAP2.12 (NP\_175794), RAP2.6 (AY114582), CRF1 (NP\_192852), CRF5 (NP\_182154), SHN2 (NM\_121157), SHN3 (NM\_122448), At5g67180 (TOE3, NM\_126118), At4g37750 (ANT, NM\_119937), At2g28550 (RAP2.7, NM\_001202696), At1g71450 (FUF1, NM\_105814), At1g78080 (RAP2.4, NM\_106457), At5g25810 (TNY, NM\_122482), At1g50680 (NM\_103950), At1g13260 (RAV1, NM\_101197), At1g68840 (RAV2, NM\_001198423) were from *Arabidopsis thaliana*, SodERF3 (AM493723) was from

*Saccharum officinarum*, JERF1 (AY044235), JERF3 (EU910896), LeERF2 (NM\_001247379), LeERF3 (AY192369) and TSRF1 (AF494201) were from *Solanum lycopersicum*, TaERF1 (AY271984), TaERF2 (AY271985) and TaERF3 (EF570122) were from *Triticum aestivum*, GmERF3 (EU681278) was from *Glycine max*, GhERF2 (AY781117) was from *Gossypium hirsutum*, CaERFLP1 (AY529642) was from *Capsicum annum*, NtERF5 (AY655738) and Tsi1 (AF058827) were from *Nicotiana tabacum*, Sub1A-1 (AAZ06252) was from *Oryza sativa*, and TiERF1 (EF570121) was from *Thinopyrum intermedium*.

**Supporting Figure S3.** Identification of the positive *ERF1-V* transgenic plants.

- (a) Positive transgenic plant identification using the *Bar* gene by PCR analysis.
- (b) Gene expression analysis in the identified transgenic plants by RT-PCR analysis.

CK: plasmid DNA; Y158: recipient Yangmai158

**Supporting Figure S4.** Evaluation of the transgenic plants to drought tolerance.

- (a) The seedlings of the *ERF1-V* transgenic plants were less wilted than Yangmai158 three days after PEG-6000 treatment.
- (b) The seedlings of the *ERF1-V* transgenic plants recovered quickly one day after re-watering while Yangmai158 was still wilted.

**Supporting Figure S5.** Evaluation of the transgenic plants to salt tolerance.

The *ERF1-V* over-expression plants showed higher tolerance to salt stress. (a), (b). The seedlings and roots cultured in the Hoagland nutrition. (c), (d). The seedlings and roots cultured in 150mmol/L NaCl.

**Supporting Figure S6.** Measurement of plant height, effective tiller number, spike length, spike number of the transgenic plants and Yangmai158. Data are presented as means  $\pm$  SD, and bars marked with different letters indicate significantly different means using the one-way ANOVA LSD analysis ( $P < 0.05$ ).

## Supporting Table

**Table S1.** Designed primers

|                                                                                | Primer Name           | Primer Sequence (5' to 3')    |
|--------------------------------------------------------------------------------|-----------------------|-------------------------------|
| PCR primers for cDNA library screening                                         | <i>ERF1-V-F</i>       | CTCTCCCAAGATGACTTCAG          |
|                                                                                | <i>ERF1-V-R</i>       | CATAAGAAACCTCGTCCAAG          |
| Primers for pGBKT7: <i>ERF1-V</i> vector construction                          | <i>ERF1-V-EcoRI-F</i> | CCGGAATTCATGTGCGGGCGGCGGATCCT |
|                                                                                | <i>ERF1-V-SmaI-R</i>  | TCACCCGGGTCAGAAACCACAAACGGGCA |
| Primers for pAHC: <i>Hv-ERF</i> vector construction                            | <i>ERF1-V-SmaI-F</i>  | TCCCCCGGGATGTGCGGGCGGCGGATCCT |
|                                                                                | <i>ERF1-V-SacI-R</i>  | ACCGAGCTCTCAGAAACCACAAACGGGCA |
| Primers for <i>ERF1-V</i> detection in the transgenic plants                   | <i>Ubi-F</i>          | CCCTGTTGTTTGGTGTTAC           |
|                                                                                | <i>ERF1-V-TR</i>      | TTAAGTCATCTTGGGAGAGG          |
| Primers for <i>Bar</i> detection in the transgenic plants                      | <i>Bar-F</i>          | CAGGAACCGCAGGAGTGGA           |
|                                                                                | <i>Bar-R</i>          | AAACCCACGTCATGCCAGTTC         |
| Primers for semi-quantitative RT-PCR of <i>ERF1-V</i> in the transgenic plants | <i>ERF1-V-RT-F</i>    | AAGAACCAATTCAGGGGTAT          |
|                                                                                | <i>ERF1-V-RT-R</i>    | TTGGTTCCTCTGGAAAGTTA          |
| qRT-PCR primers for <i>ERF1-V</i> after stresses and hormone treatments        | <i>ERF1-V-QRT-F</i>   | AGCACAGGAACCTACCGTCAT         |
|                                                                                | <i>ERF1-V-QRT-R</i>   | CCCAAGTCAGAACAGCCAAA          |
| qRT-PCR primers for the abiotic stress tolerance related genes                 | <i>TaNHX1-F</i>       | GGGAGTGGTACTGGTCTGC           |
|                                                                                | <i>TaNHX1-R</i>       | ATGACAATGTCGCAAAAGCA          |
|                                                                                | <i>TaP5CR-F</i>       | AATAGAGGCCATGGCTGATG          |
|                                                                                | <i>TaP5C-R</i>        | AGGGGAAGTGACCTGATCCT          |
|                                                                                | <i>TaHKT-F</i>        | CAAAGGTGAAGGAGCTGAGG          |
|                                                                                | <i>TaHKT-R</i>        | GAGCTGAGCCCATCAAAGAC          |
|                                                                                | <i>TaGSK-F</i>        | GGCAAGCAAAACAGACCATT          |
|                                                                                | <i>TaGSK-R</i>        | TCAAGAACTCGCATCGTTTG          |
|                                                                                | <i>TaOAT-F</i>        | GGCTTACACTTAGTTCCAGAGC        |
|                                                                                | <i>TaOAT-F</i>        | TCATAACCCCATTTTCTTGCCA        |
| Primers for the internal control gene                                          | <i>Tubulin-F</i>      | AGAACACTGTTGTAAGGCTCAAC       |
|                                                                                | <i>Tubulin-R</i>      | GAGCTTTACTGCCTCGAACATGG       |

### Supporting Figure S1

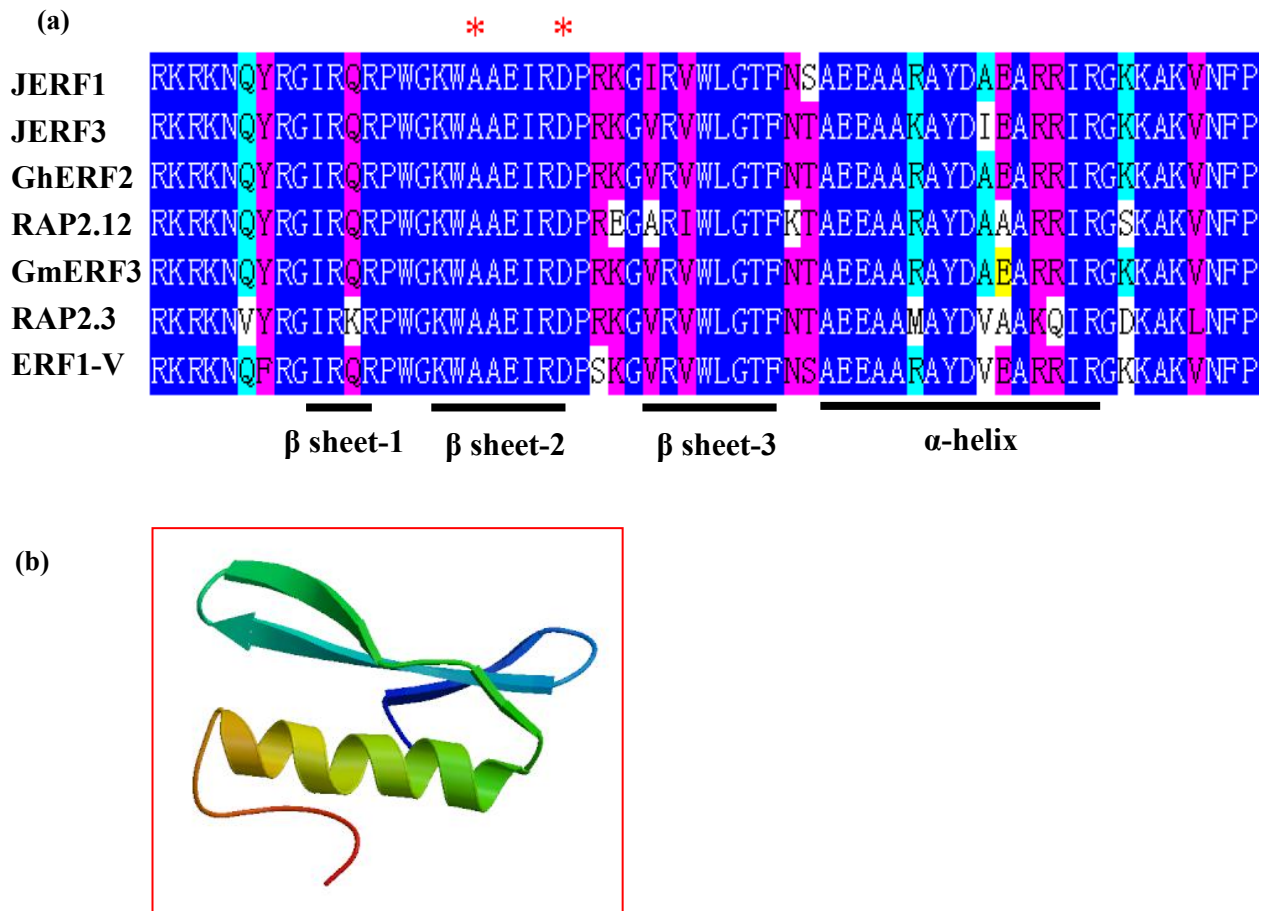

**Supporting Figure S1.** Amino acid sequence alignment of the conserved AP2 domain in the B2 type ERF proteins and the three dimensional structure of the AP domain in the ERF1-V.

(a) Multiple alignment of the conserved AP2 domain in the B2 type ERF proteins. The RAP2.3 (NM\_112550) and RAP2.12 (NP\_175794) of *Arabidopsis thaliana*, JERF1 (AY044235) and JERF3 (EU910896) from *Solanum lycopersicum*, GmERF3 (EU681278) of *Glycine max* and GhERF2 (AY781117) of *Gossypium hirsutum* were downloaded from the NCBI and used to make the multiple alignment with ERF1-V. The red asterisk above the sequences indicate the conserved amino acid 'A' and 'D' specific to *ERF* subfamily genes which was distinct from that of the *DREB* subfamily genes. Three  $\beta$ -sheets and one  $\alpha$ -helix were underlined. (b) Three dimensional structure of the AP domain in the ERF1-V.

## Supporting Figure S2

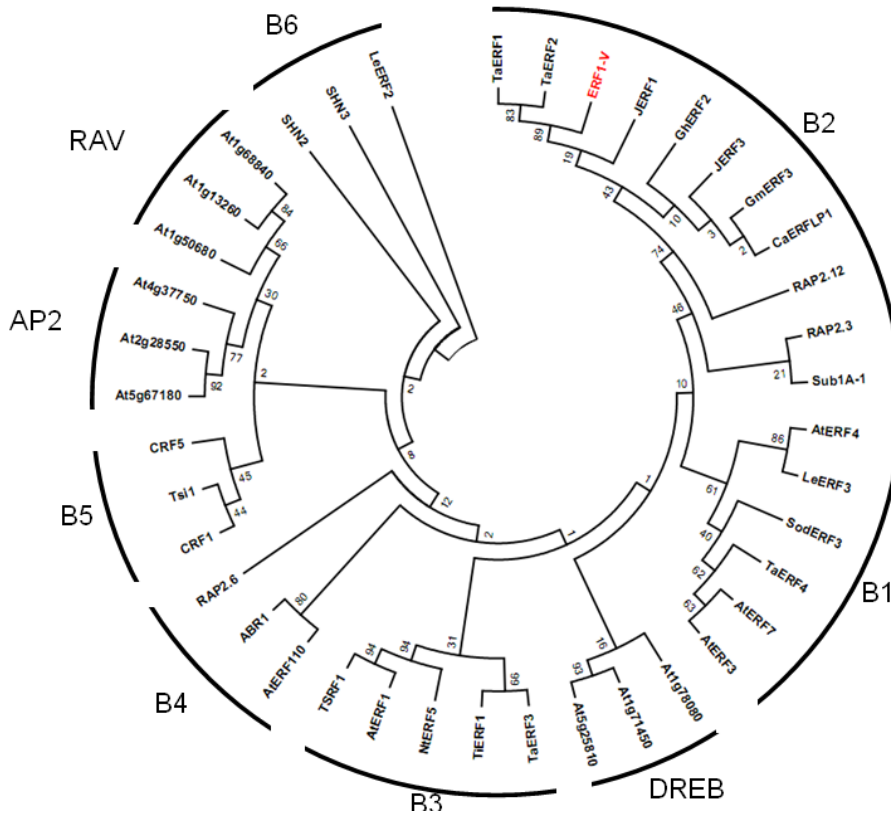

**Supporting Figure S2.** The phylogenetic analysis of ERF1-V and related proteins by MEGA6. ERF1-V was classified to the B2 type ERF subfamily. The sequence of AtERF4 (AY140030), AtERF7 (AB032201), AtERF3 (AB008105), AtERF1 (NM\_113225), AtERF110 (NP\_199819), ABR1 (NM\_125871), RAP2.3 (NM\_112550), RAP2.12 (NP\_175794), RAP2.6 (AY114582), CRF1 (NP\_192852), CRF5 (NP\_182154), SHN2 (NM\_121157), SHN3 (NM\_122448), At5g67180 (TOE3, NM\_126118), At4g37750 (ANT, NM\_119937), At2g28550 (RAP2.7, NM\_001202696), At1g71450 (FUF1, NM\_105814), At1g78080 (RAP2.4, NM\_106457), At5g25810 (TNY, NM\_122482), At1g50680 (NM\_103950), At1g13260 (RAV1, NM\_101197), At1g68840 (RAV2, NM\_001198423) were from *Arabidopsis thaliana*, SodERF3 (AM493723) was from *Saccharum officinarum*, JERF1 (AY044235), JERF3 (EU910896), LeERF2 (NM\_001247379), LeERF3 (AY192369) and TSRF1 (AF494201) were from *Solanum lycopersicum*, TaERF1 (AY271984), TaERF2 (AY271985) and TaERF3 (EF570122) were from *Triticum aestivum*, GmERF3 (EU681278) was from *Glycine max*, GhERF2 (AY781117) was from *Gossypium hirsutum*, CaERFLP1 (AY529642) was from *Capsicum annuum*, NtERF5 (AY655738) and Tsi1 (AF058827) were from *Nicotiana tabacum*, Sub1A-1 (AAZ06252) was from *Oryza sativa*, and TiERF1 (EF570121) was from *Thinopyrum intermedium*.

### Supporting Figure S3

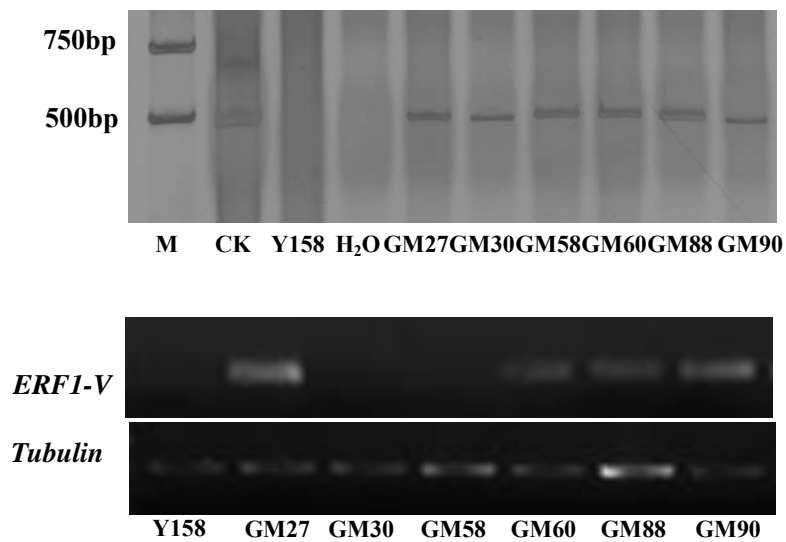

**Supporting Figure S3.** Identification of the positive *ERF1-V* transgenic plants.

(a) Positive transgenic plant identification using the *Bar* gene by PCR analysis.

(b) Gene expression analysis in the identified transgenic plants by RT-PCR analysis.

CK: plasmid DNA; Y158: recipient Yangmai158

## Supporting Figure S4

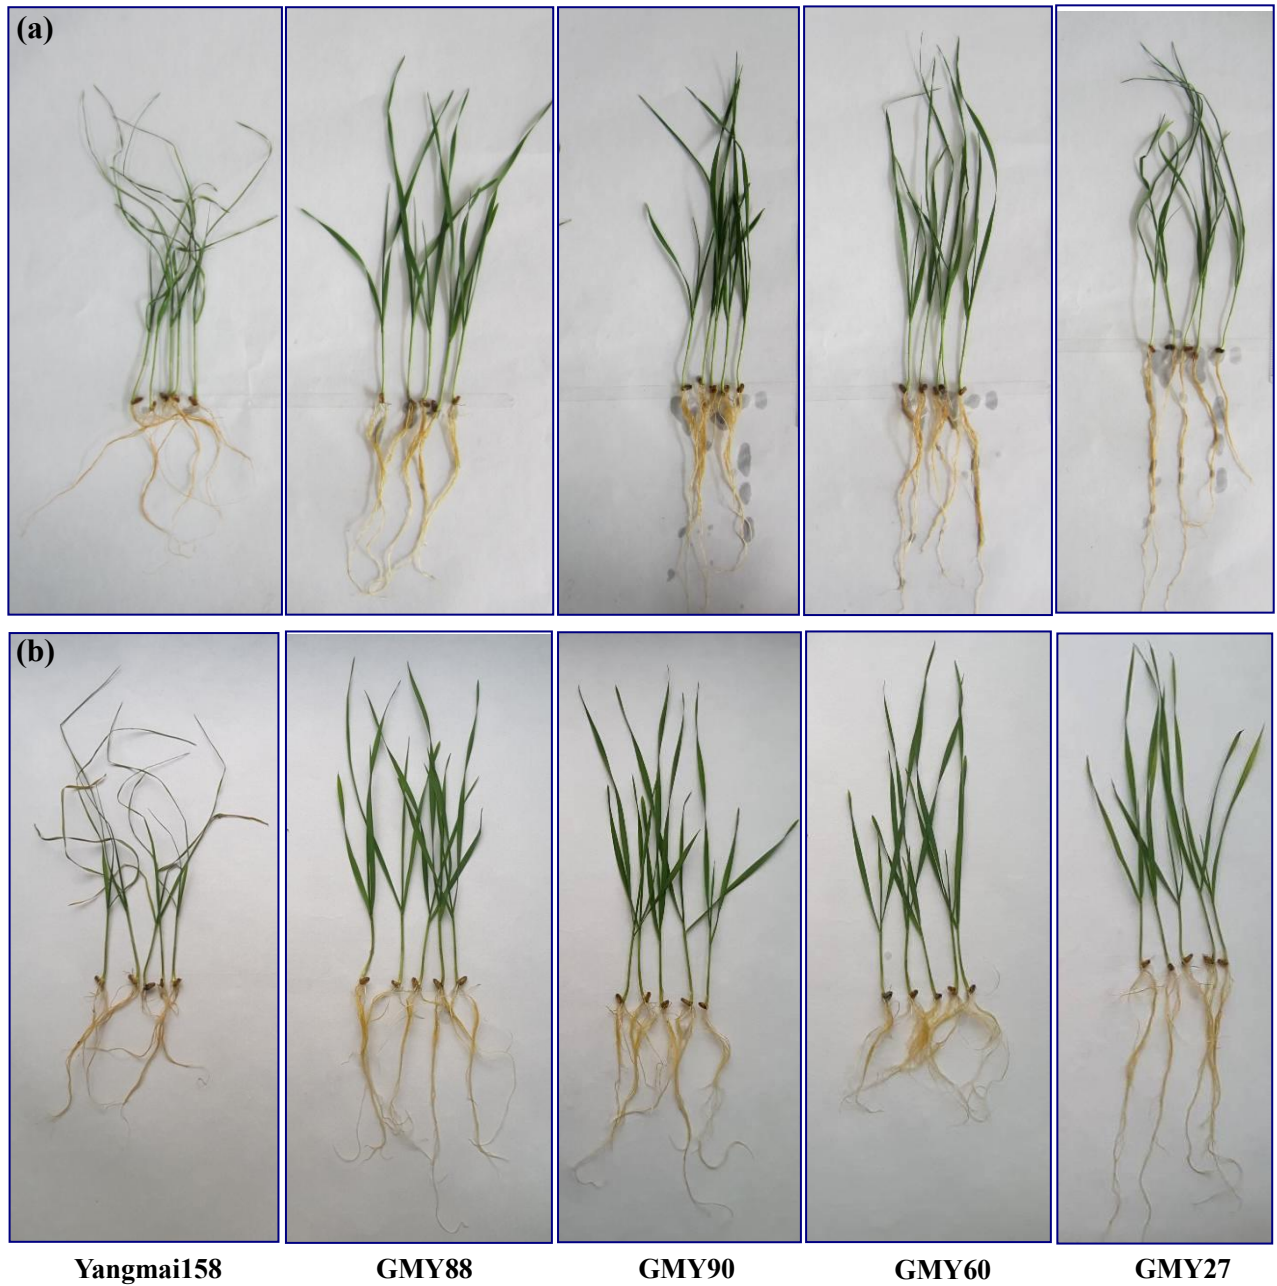

**Supporting Figure S4.** Evaluation of the transgenic plants to drought tolerance.

(a) The seedlings of the *ERF1-V* transgenic plants were less wilted than Yangmai158 three days after PEG-6000 treatment.

(b) The seedlings of the *ERF1-V* transgenic plants recovered quickly one day after re-watering while Yangmai158 was still wilted.



**Supporting Figure S5**

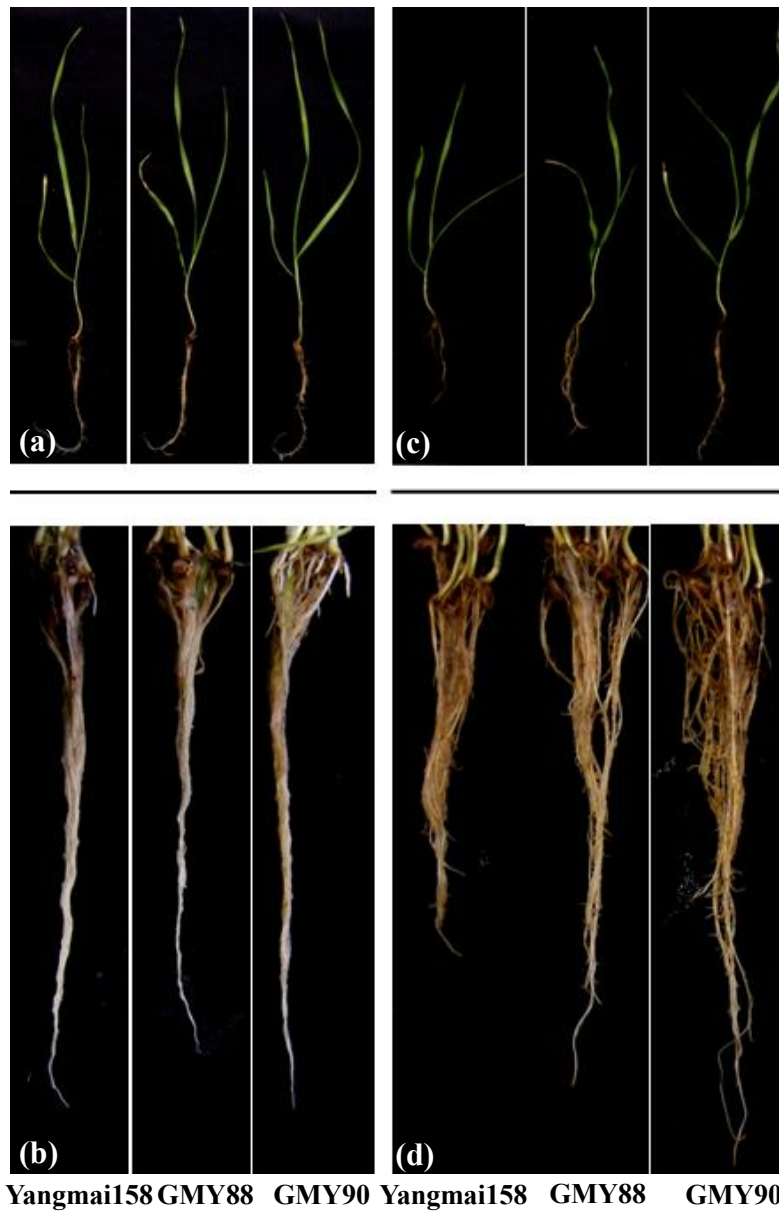

**Supporting Figure S5.** Evaluation of the transgenic plants to salt tolerance.

The *ERFI-V* over-expression plants showed higher tolerance to salt stress.

(a), (b). The seedlings and roots cultured in the Hoagland nutrition.

(c), (d). The seedlings and roots cultured in 150mmol/L NaCl.

## Supporting Figure S6

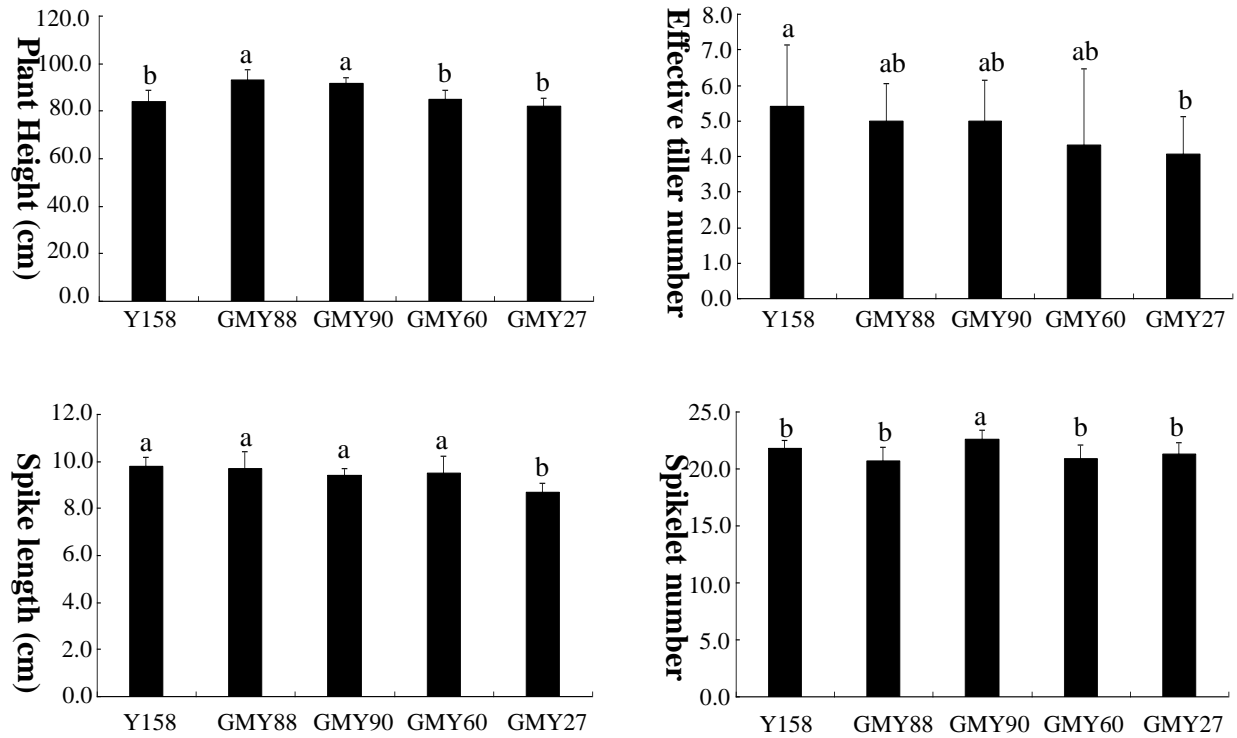

**Supporting Figure S6.** Measurement of plant height, effective tiller number, spike length, spike number of the transgenic plants and Yangmai158. Data are presented as means  $\pm$  SD, and bars marked with different letters indicate significantly different means using the one-way ANOVA LSD analysis ( $P < 0.05$ ).
